# Supplementary material for: Mussel inspired redox surface for one step visual and colorimetric detection of Hg2+ during the formation of Ag@DOPA@Hg nanoparticles
Source: Royal Society of Chemistry journal article supplement (doi:10.1039/c5ay01272d), 2015-01-01
Supplement: c5ay01272d1.pdf [file c5ay01272d1.pdf]

**Supporting Information**

**Mussel inspired redox surface for one step visual and  
colorimetric detection of Hg<sup>2+</sup> during the formation of  
Ag@DOPA@Hg nanoparticles**

*Yuling Hu, \* Dongmei Wang and Gongke Li\**

School of Chemistry and Chemical Engineering, Sun Yat-sen University, Guangzhou

510275, P. R. China.

\*Corresponding Author.

Tel: +86-20-84110922;

E-mail: [ceshyl@mail.sysu.edu.cn](mailto:ceshyl@mail.sysu.edu.cn);

[cesgkl@mail.sysu.edu.cn](mailto:cesgkl@mail.sysu.edu.cn)

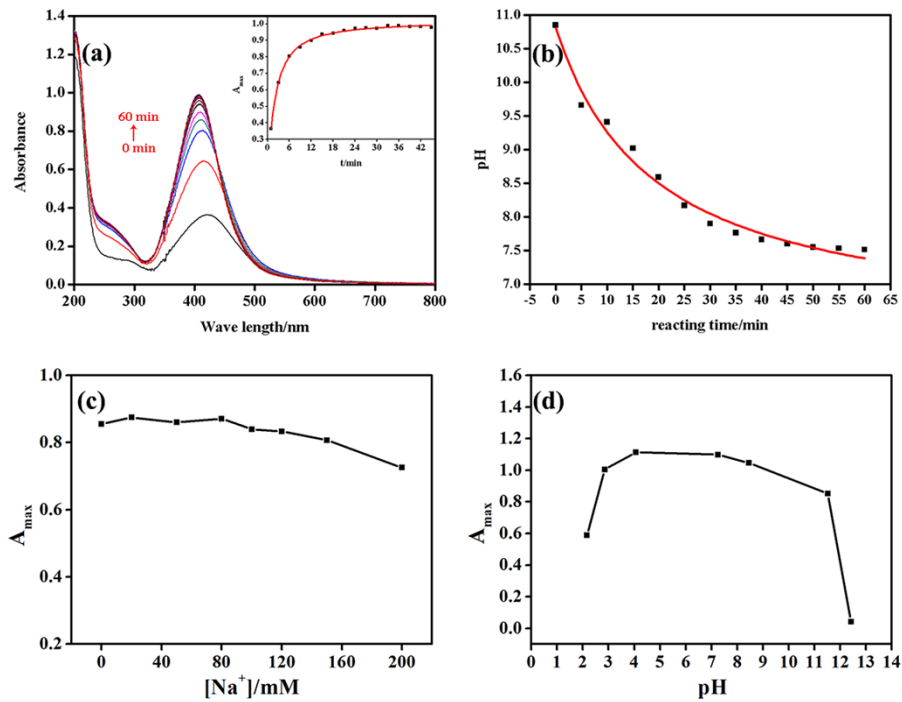

**Figure S1.** The absorption spectrum of Ag@DOPA with different reacting time (a), inset graph of  $A_{\max}$  describes the plot of  $A_{\max}$  against reacting time; The pH of the reacting solution against reacting time (b); the stability of Ag@DOPA: plot of  $A_{\max}$  of Ag@DOPA against different concentration of  $\text{Na}^+$  (c), pH (d).

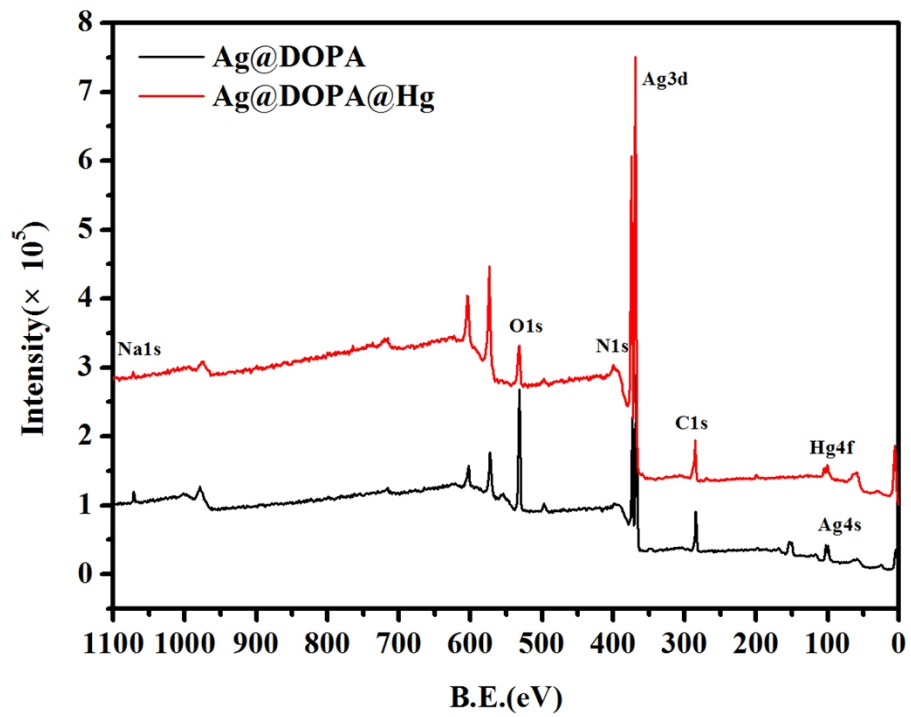

**Figure S2.** XPS survey spectrum of Ag@DOPA and Ag@DOPA@Hg NPs. The concentration of Hg<sup>2+</sup> was 5 $\mu$ M.

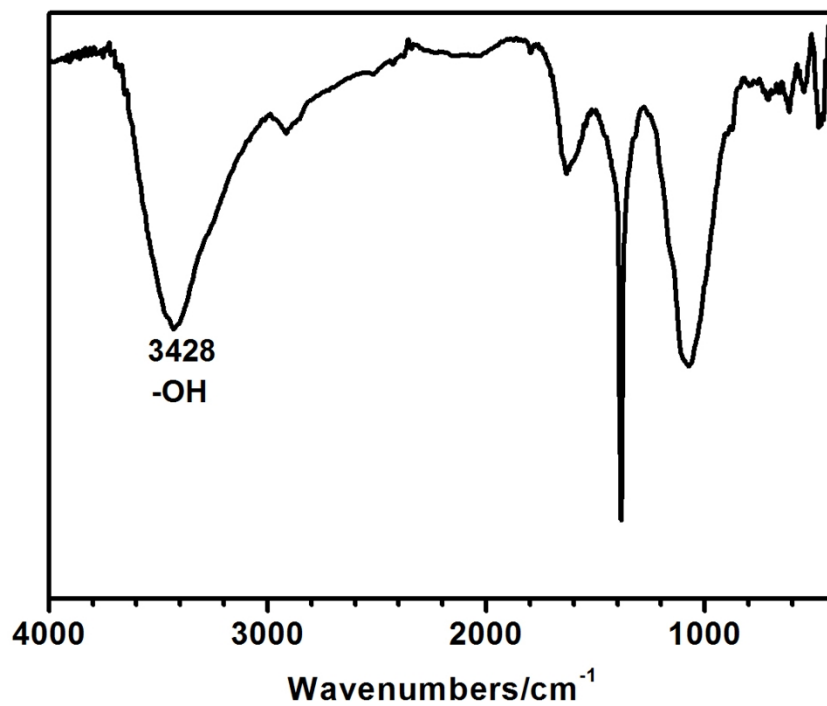

Figure S3. FT-IR spectrum of Ag@DOPA

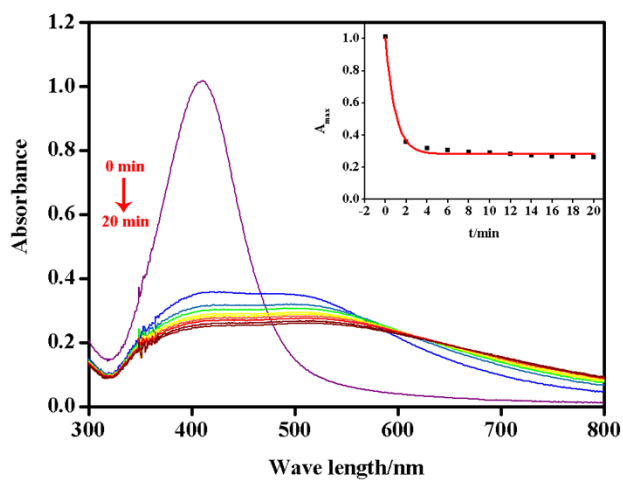

Figure S4. The absorption spectrum of Ag@DOPA in the presence of 5 μM Hg<sup>2+</sup> with different reacting time, inset graph describes the plot of A<sub>max</sub> against reacting time.
